# Supplementary material for: Enabling uniform Li deposition behavior with dynamic electrostatic shield by the single effect of potassium cation additive for dendrite-free lithium metal batteries
Source: Royal Society of Chemistry journal article supplement (doi:10.1039/d3qm00392b), 2023-01-01
Supplement: d3qm00392b1.pdf [file d3qm00392b1.pdf]

## Electronic Supplementary Information

### Enabling Uniform Li Deposition Behavior with Dynamic Electrostatic Shield by The Single Effect of Potassium Cation Additive for Dendrite-Free Lithium Metal Batteries

*Ji Woo Han<sup>a,‡</sup>, Bo Keun Park<sup>a,‡</sup>, Yong Min Kim<sup>a</sup>, Yoonbo Sim<sup>a</sup>, Van-Chuong Ho<sup>b</sup>, Junyoung Mun<sup>b,c,\*</sup> and Ki Jae Kim<sup>a,c,\*</sup>*

*<sup>a</sup>Department of Energy Science, Sungkyunkwan University, 2066, Seobu-ro, Jangan-gu, Suwon-si, Gyeonggi-do, 16419, Republic of Korea*

*<sup>b</sup>School of Advanced Materials Science & Engineering, Sungkyunkwan University, 2066, Seobu-ro, Jangan-gu, Suwon-si, Gyeonggi-do, 16419, Republic of Korea*

*<sup>c</sup>SKKU Institute of Energy Science and Technology (SIEST), Sungkyunkwan University, 2066, Seobu-ro, Jangan-gu, Suwon-si, Gyeonggi-do, 16419, Republic of Korea*

*‡* These authors contributed equally to this work

*\**Corresponding Authors: Junyoung Mun(munjy@skku.edu), Ki Jae Kim

(kijaekim@skku.edu)

| Cations         | $E^0$ (V)<br>1.0 M | Effective reduction potential (V) |         |         |         |
|-----------------|--------------------|-----------------------------------|---------|---------|---------|
|                 |                    | 0.005 M                           | 0.010 M | 0.020 M | 0.050 M |
| Li <sup>+</sup> | -3.040             | .                                 | .       | .       | .       |
| K <sup>+</sup>  | -2.931             | -3.067                            | -3.049  | -3.032  | -3.008  |

**Table S1.** Summary effective reduction potentials (vs. standard hydrogen electrode or SHE) of Li<sup>+</sup> and K<sup>+</sup> at different concentrations calculated by the Nernst equation.

| <b>Electrolyte composition</b>                                                                                              | <b>Current Density (mA cm<sup>-2</sup>)</b> | <b>Areal capacity (mAh cm<sup>-2</sup>)</b> | <b>Cycle Life (hours)</b> | <b>Reference</b> |
|-----------------------------------------------------------------------------------------------------------------------------|---------------------------------------------|---------------------------------------------|---------------------------|------------------|
| 1.0 M LiTFSI in DOL/DME/TEGDME (v/v/v = 1:1:2) with 2.0 wt. % LiNO <sub>3</sub>                                             | 1.0                                         | 1.0                                         | 600                       | [1]              |
| 1.0 M LiTFSI in DOL/DME (v/v = 1:1) with 1.0 wt. % LiNO <sub>3</sub> + 5 mM C <sub>60</sub> (NO <sub>2</sub> ) <sub>6</sub> | 1.0                                         | 1.0                                         | 400                       | [2]              |
| 1.0 M LiTFSI in DOL/DME (v/v = 1:1) with 1.0 M Pyr6(6)FSI                                                                   | 1.0                                         | 1.0                                         | 550                       | [3]              |
| 1.0 M LiTFSI in DOL/DME (v/v = 1:1) with 0.5 wt. % Im1(8)PF <sub>6</sub>                                                    | 1.0                                         | 1.0                                         | 500                       | [4]              |
| 1.0 M LiTFSI in DOL/DME (v/v = 1:1) with 2.0 wt. % Tyr                                                                      | 1.0                                         | 1.0                                         | 400                       | [5]              |
| 1.0 M LiTFSI in DOL/DME (v/v = 1:1) with 1.0 wt. % LiNO <sub>3</sub> + 1.0 wt. % VO79                                       | 4.0                                         | 1.0                                         | 250                       | [6]              |
| <b>1.0 M LiTFSI in DOL/DME (v/v = 1:1) with 1.0 wt. % LiNO<sub>3</sub> + 0.010 M KTFSI</b>                                  | <b>1.0<br/>4.0</b>                          | <b>1.0<br/>1.0</b>                          | <b>600<br/>400</b>        | <b>Our works</b> |

**Table S2.** Comparison of cycling performance for this work with recently reported in the Li symmetric cells.

|                         | $R_e$<br>( $\Omega$ ) | $R_{SEI}$<br>( $\Omega$ ) | $R_{ct}$<br>( $\Omega$ ) | $R_{Interface}$<br>( $\Omega$ ) |
|-------------------------|-----------------------|---------------------------|--------------------------|---------------------------------|
| Pristine                | 1.58                  | 68.9                      | 26.1                     | 95.0                            |
| 20 <sup>th</sup> Cycles | 2.11                  | 1.84                      | 10.41                    | 12.25                           |
| 40 <sup>th</sup> Cycles | 3.73                  | 2.89                      | 14.40                    | 17.28                           |
| 60 <sup>th</sup> Cycles | 5.61                  | 4.08                      | 20.52                    | 24.60                           |

**Table S3.** EIS fitting results of the Li | Li symmetric cell with LiTFSI electrolyte.

|                         | $R_e$<br>( $\Omega$ ) | $R_{SEI}$<br>( $\Omega$ ) | $R_{ct}$<br>( $\Omega$ ) | $R_{Interface}$<br>( $\Omega$ ) |
|-------------------------|-----------------------|---------------------------|--------------------------|---------------------------------|
| Pristine                | 1.37                  | 34.87                     | 57.11                    | 91.98                           |
| 20 <sup>th</sup> Cycles | 1.67                  | 0.90                      | 9.30                     | 10.20                           |
| 40 <sup>th</sup> Cycles | 2.10                  | 1.61                      | 14.99                    | 16.60                           |
| 60 <sup>th</sup> Cycles | 3.91                  | 2.52                      | 14.40                    | 16.92                           |

**Table S4.** EIS fitting results of the Li | Li symmetric cell with 10 KTFSI electrolyte.

|          | After 1 <sup>st</sup> Cycle    |                                  |                                 | After 50 <sup>th</sup> Cycles  |                                  |                                 |
|----------|--------------------------------|----------------------------------|---------------------------------|--------------------------------|----------------------------------|---------------------------------|
|          | R <sub>e</sub><br>( $\Omega$ ) | R <sub>SEI</sub><br>( $\Omega$ ) | R <sub>ct</sub><br>( $\Omega$ ) | R <sub>e</sub><br>( $\Omega$ ) | R <sub>SEI</sub><br>( $\Omega$ ) | R <sub>ct</sub><br>( $\Omega$ ) |
| LiTFSI   | 1.62                           | 2.70                             | 50.76                           | 1.27                           | 6.90                             | 131.70                          |
| 10 KTFSI | 1.25                           | 6.72                             | 52.97                           | 1.07                           | 5.47                             | 44.86                           |

**Table S5.** EIS fitting results of the Li | LFP full cells with two types of electrolytes.

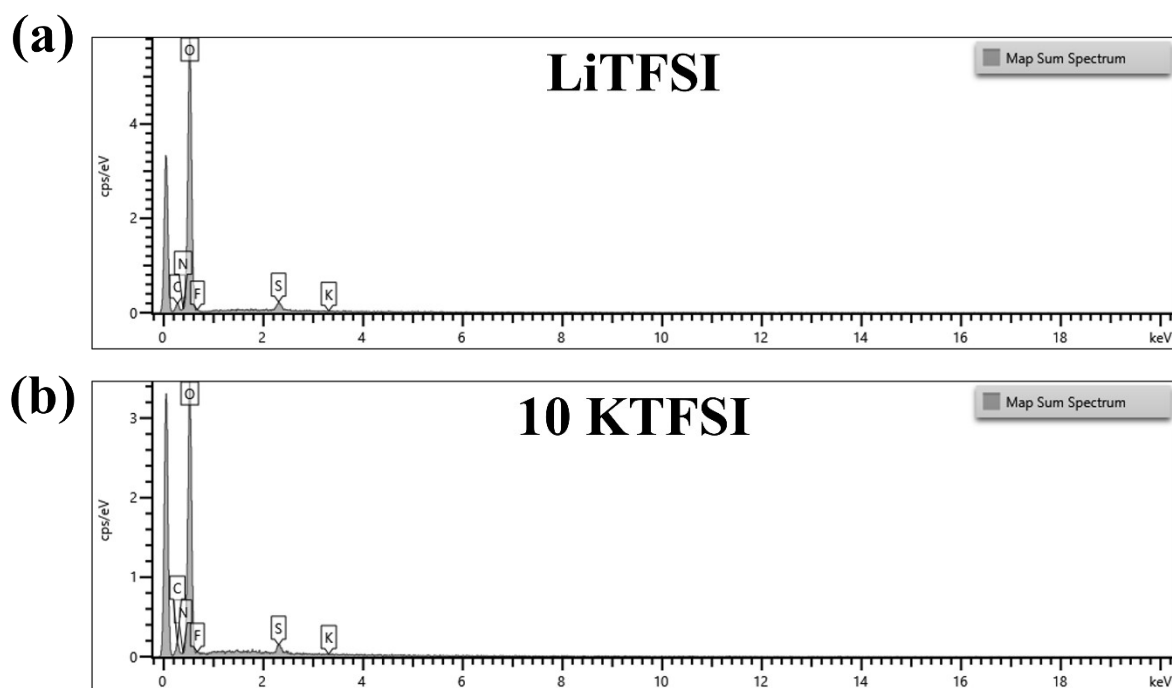

**Fig. S1** EDS mapping spectrum of the deposited Li electrode of Li | Li cells from the electrolyte added (a) LiTFSI and (b) 10 KTFSI.

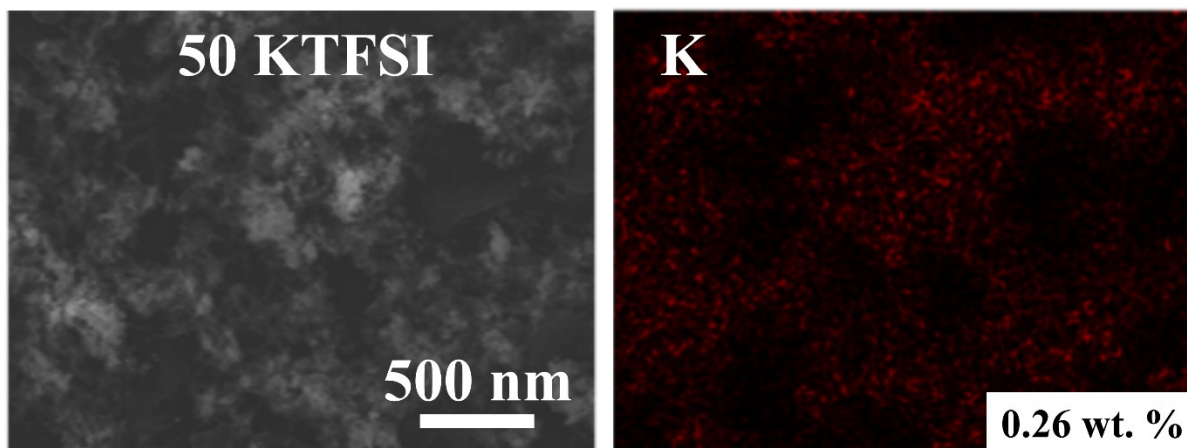

**Fig. S2** SEM (left) and EDS potassium mapping images (right) of the deposited Li electrode of Li | Li cells from the electrolyte added 50 KTFSI with weight percent of K element.



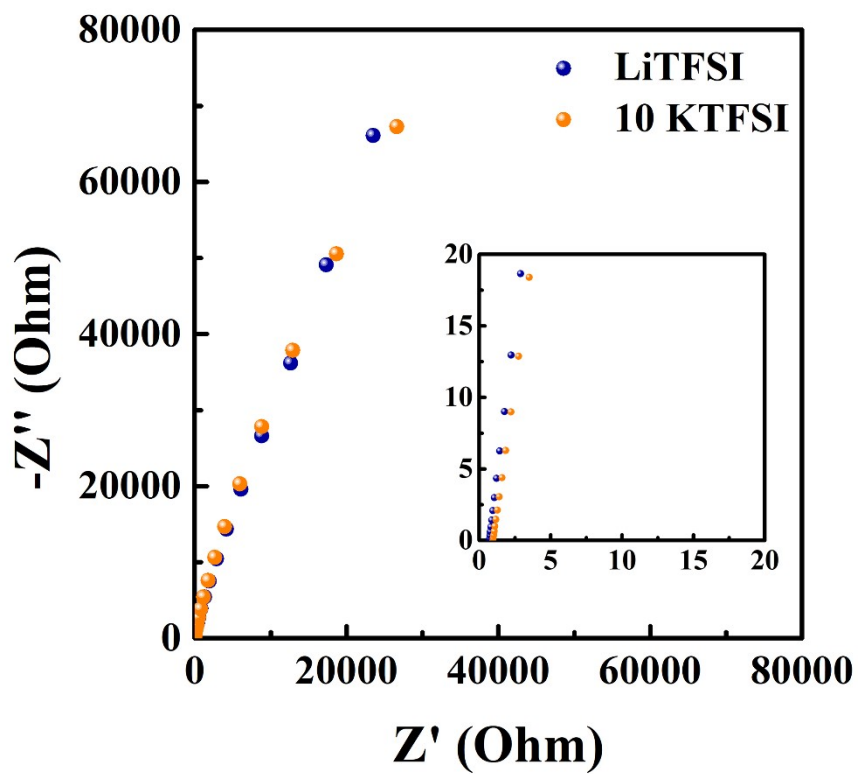

**Fig. S3** The EIS plots of cells with and without KTFSI additive at the frequency of 0.1–10<sup>6</sup> Hz, and the cells were assembled by the form of SUS | PE separator | SUS.

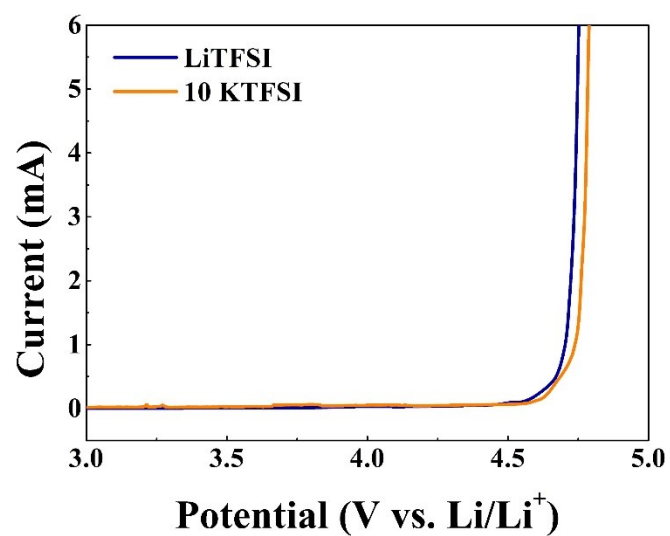

**Fig. S4** Linear sweep voltammetry (LSV) curves of with and without KTFSI additive at the scan rate of  $1.0 \text{ mV}\cdot\text{s}^{-1}$  and the cells were assembled by the form of Li | PE separator | SUS.

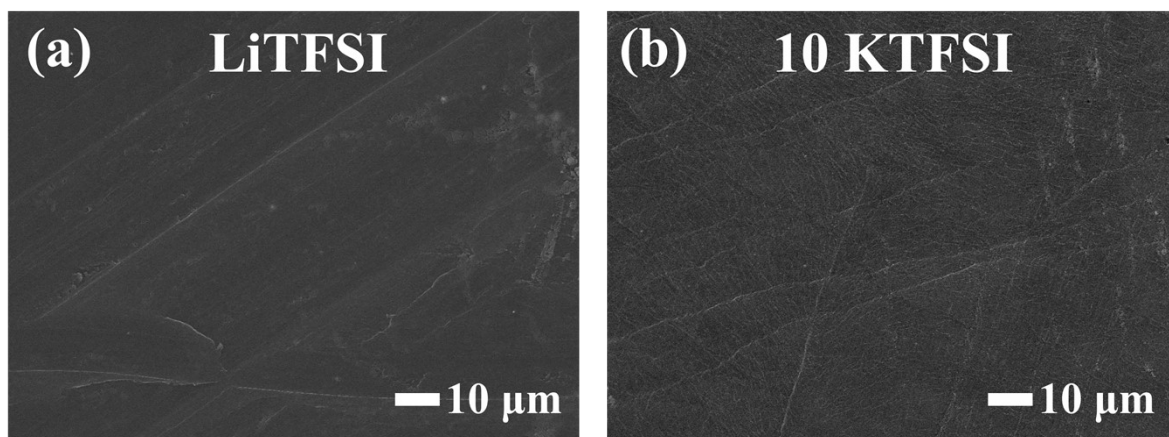

**Fig. S5** SEM images of Li metal surface in Li | Cu cells with (a) LiTFSI and (b) 10 KTFSI after storage for 24 hours.

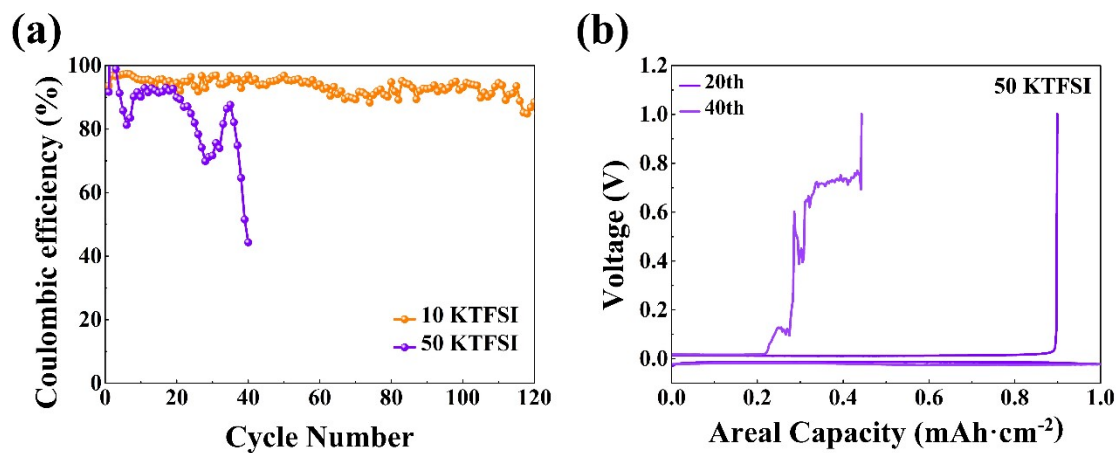

**Fig. S6** (a) Comparison of their Coulombic efficiencies over cycling at a current density of  $1.0 \text{ mA cm}^{-2}$ , and the corresponding Li plating and stripping voltage profiles of (b) 50 KTFSI electrolytes.

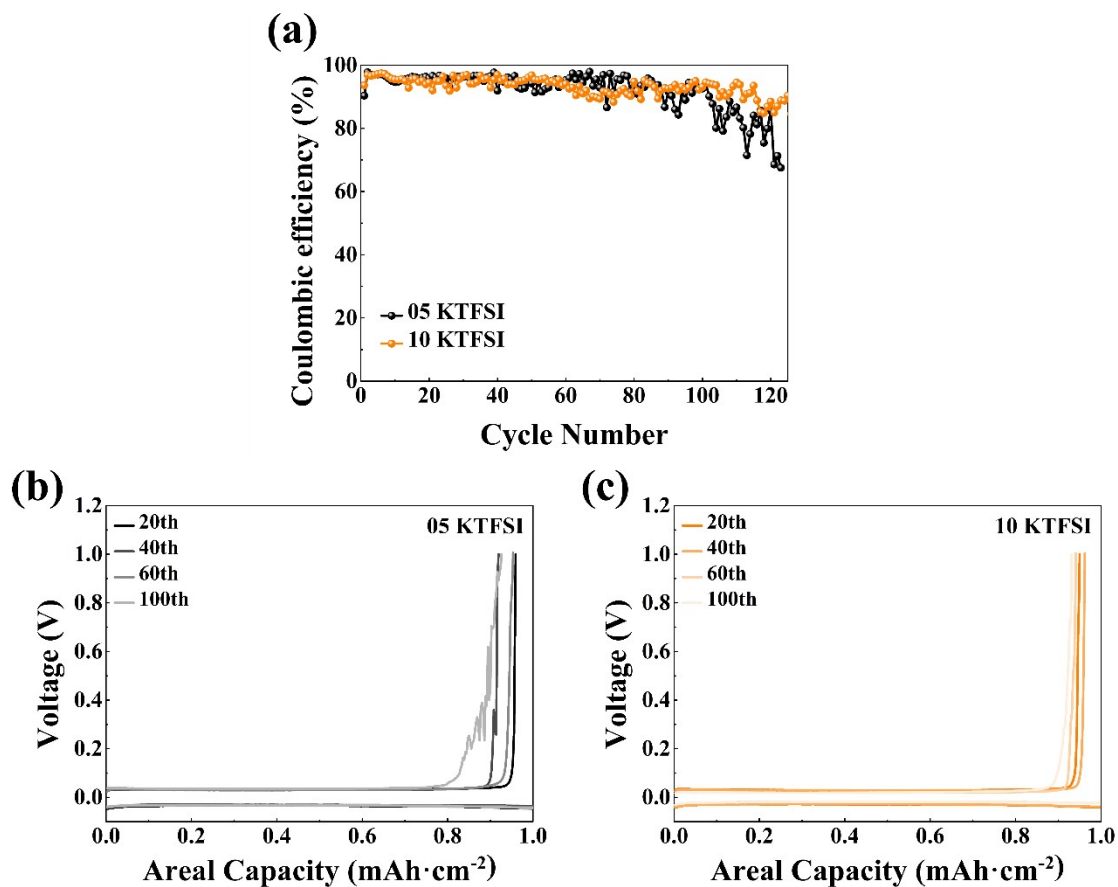

**Fig. S7** (a) Comparison of their Coulombic efficiencies over cycling at a current density of  $1.0 \text{ mA cm}^{-2}$ , and the corresponding Li plating and stripping voltage profiles of (b) 05 KTFSI and (c) 10 KTFSI electrolytes.

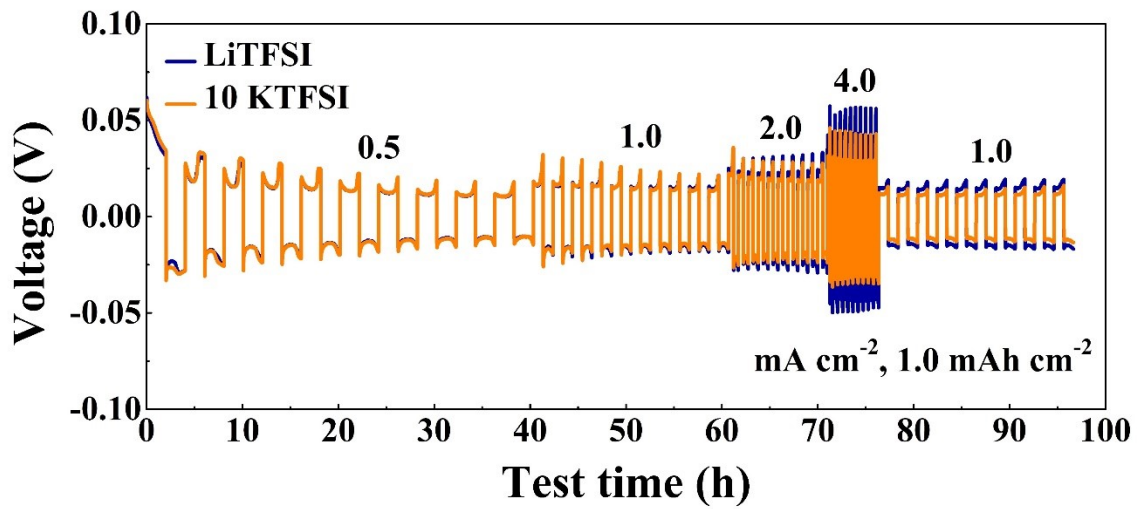

**Fig. S8** voltage profile of Li | Li symmetric cells with different electrolytes, Areal capacity = 1.0 mAh cm<sup>-2</sup>, at different areal current density = 0.5, 1.0, 2.0, 4.0, 1.0 mA cm<sup>-2</sup>.

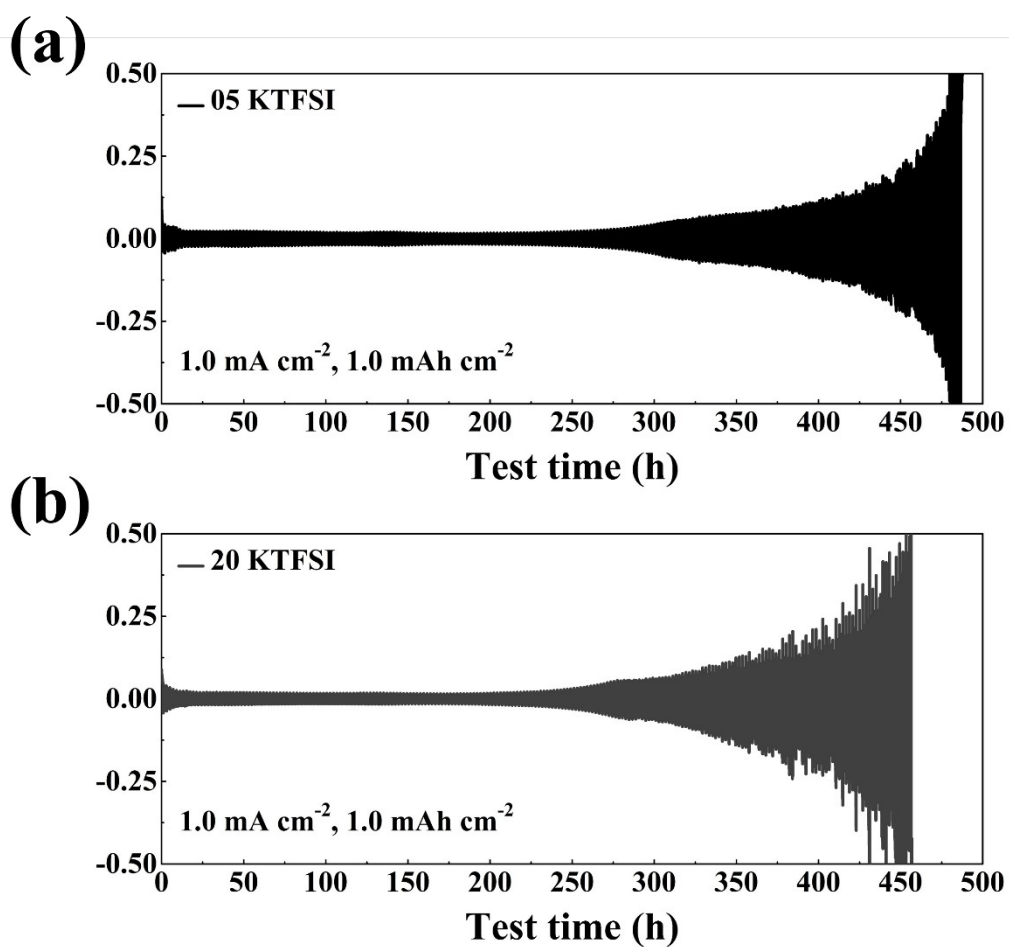

**Fig. S9** Galvanostatic Li stripping/plating voltage profiles of symmetric cells with (a) 05 KTFSI and (b) 20 KTFSI at  $1.0 \text{ mA cm}^{-2}$  with a capacity of  $1.0 \text{ mAh cm}^{-2}$ .

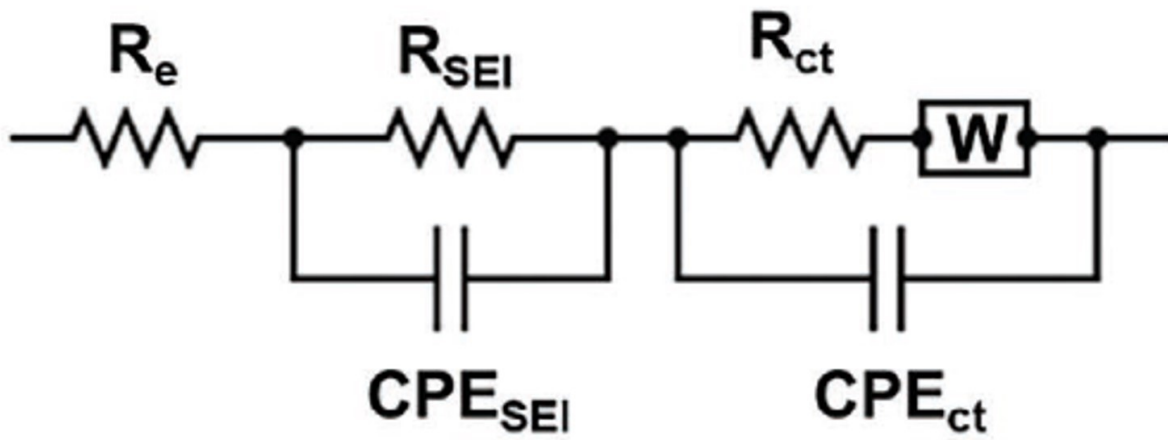

**Fig. S10** Equivalent fitting circuit applied to fit the impedance spectra.



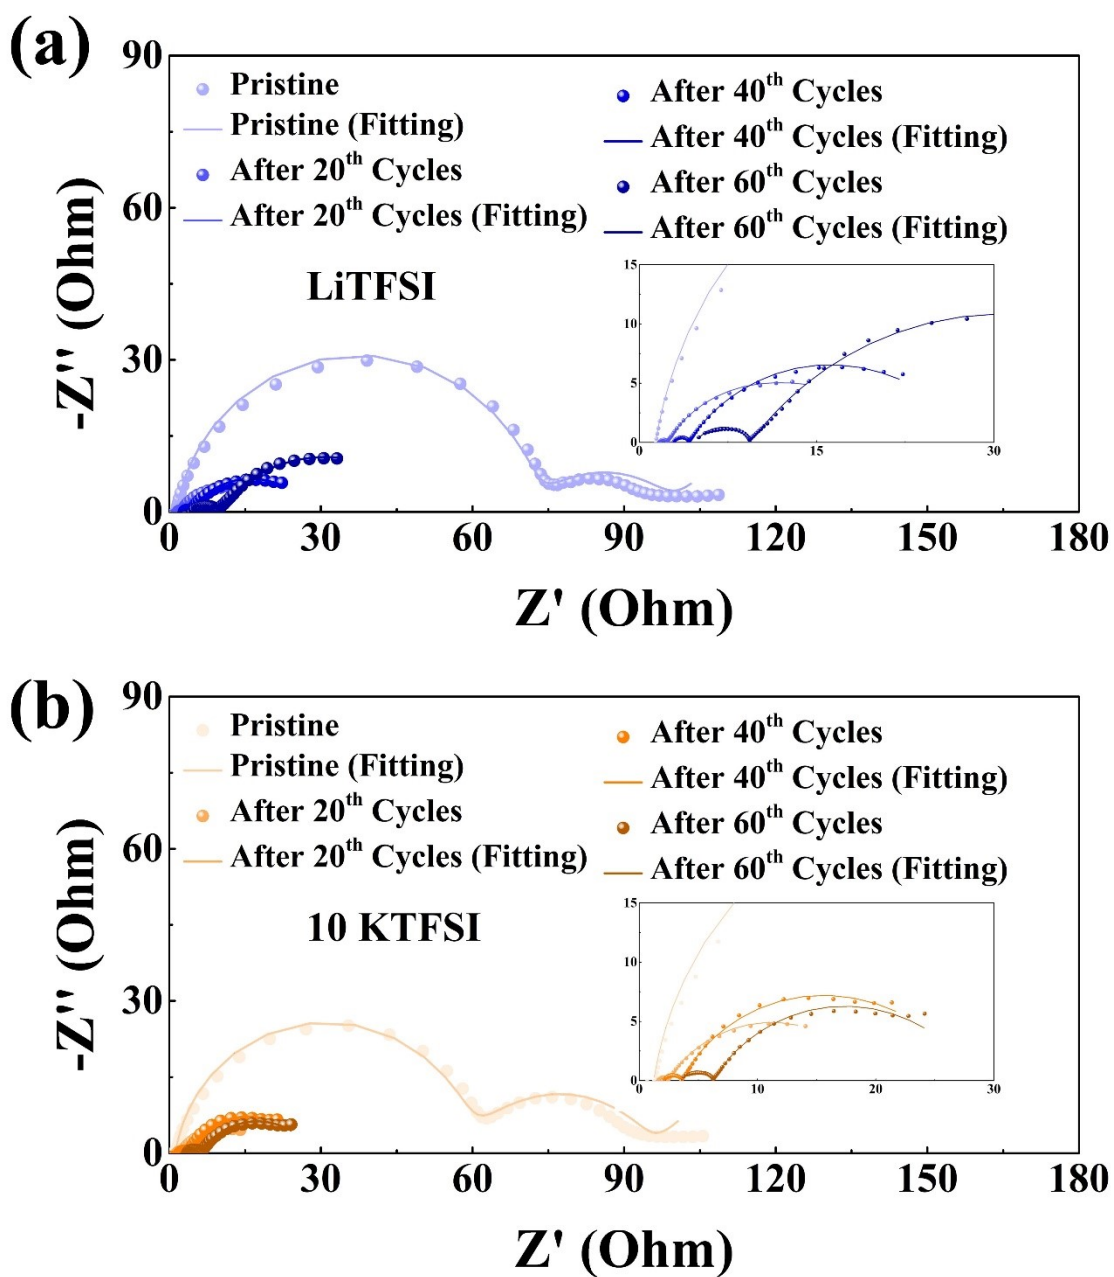

**Fig. S11** Nyquist plots of the Li | Li symmetric cells with (a) LiTFSI (b) 10 KTFSI; the inset figure is the magnified view, and the line is the fitting curve.

## After 30 cycles

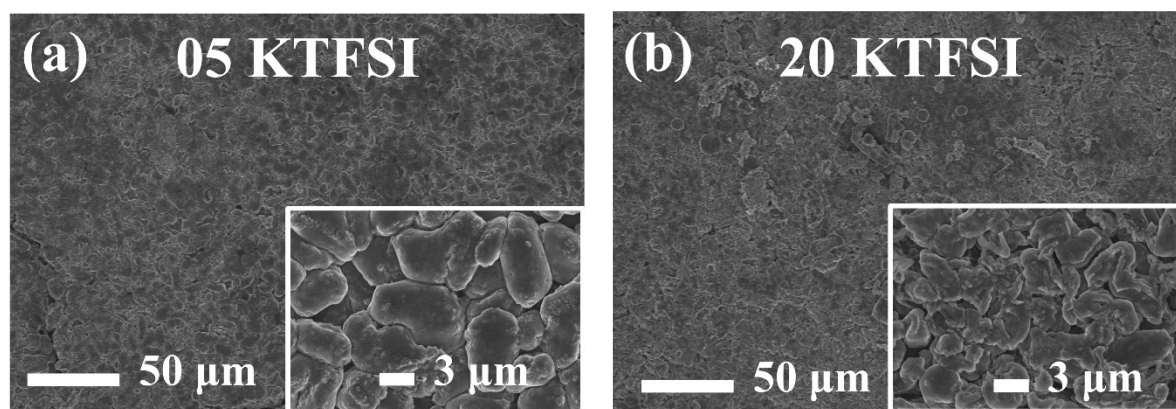

**Fig. S12** Top-view SEM images of the lithium deposition morphology: The cell with (a) 05 KTFSI and 20 KTFSI after 30 cycles.

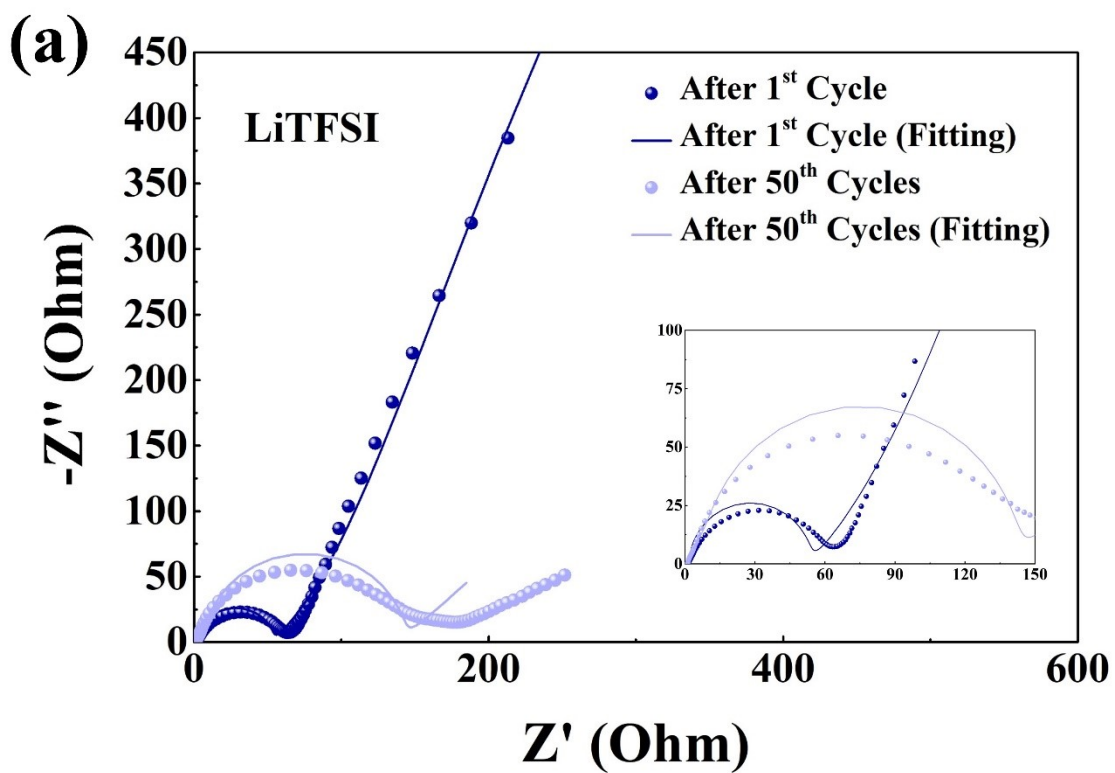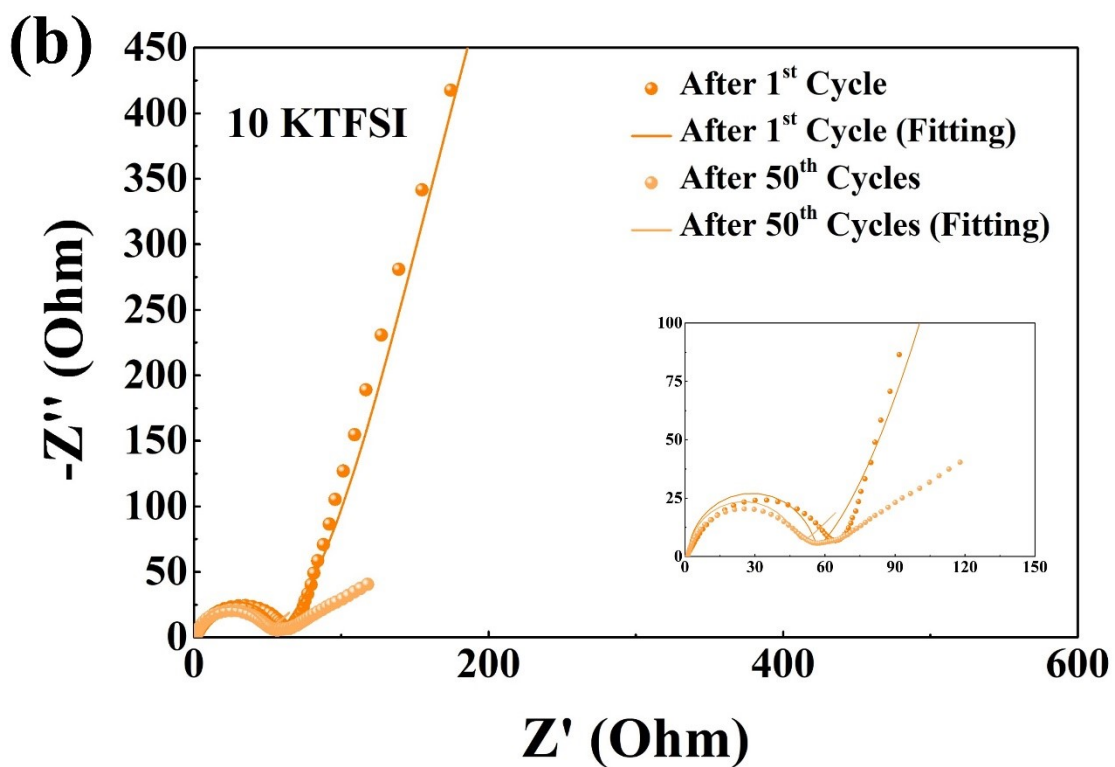

**Fig. S13** Nyquist plots of the Li | LFP full cells with a) LiTFSI b) 10 KTFSI; the inset figure is the magnified view, and the line is the fitting curve.

## References

- [1] H. Yang, L. Yin, H. Shi, K. He, H. M. Cheng and F. Li, Suppressing lithium dendrite formation by slowing its desolvation kinetics, *Chem Commun (Camb)*, 2019, **55**, 13211-13214.
- [2] Z. Jiang, Z. Zeng, C. Yang, Z. Han, W. Hu, J. Lu and J. Xie, Nitrofullerene, a C(60)-based Bifunctional Additive with Smoothing and Protecting Effects for Stable Lithium Metal Anode, *Nano Lett*, 2019, **19**, 8780-8786.
- [3] J. Jang, J. S. Shin, S. Ko, H. Park, W. J. Song, C. B. Park and J. Kang, Self-Assembled Protective Layer by Symmetric Ionic Liquid for Long-Cycling Lithium–Metal Batteries, *Advanced Energy Materials*, 2022, **12**.
- [4] W. Wang, W. Ma, Q. Yang, Z. Lin, J. Tang, M. Wang, Y. He, C. Fan and K. Sun, Imidazolium-Based Ionic Liquid as a Solid Electrolyte Interphase-Forming Additive for Lithium Metal Anodes, *Industrial & Engineering Chemistry Research*, 2022, **61**, 10883-10890.
- [5] Z. Chu, S. Zhuang, J. Lu, J. Li, C. Wang and T. Wang, In-situ electro-polymerization of l-tyrosine enables ultrafast, long cycle life for lithium metal battery, *Chinese Chemical Letters*, 2023, **34**.
- [6] S. Chang, X. Jin, Q. He, T. Liu, J. Fang, Z. Shen, Z. Li, S. Zhang, M. Dahbi, J. Alami, K. Amine, A. D. Li, H. Zhang and J. Lu, In Situ Formation of Polycyclic Aromatic Hydrocarbons as an Artificial Hybrid Layer for Lithium Metal Anodes, *Nano Lett*, 2022, **22**, 263-270.
